# Supplementary material for: Performance Evaluation of SpliceAI for the Prediction of Splicing of NF1 Variants
Source: MDPI journal article supplement (doi:10.3390/genes12091308), 2021-08-25
Supplement: s1 [file s1]

# **Performance Evaluation of SpliceAI for the Prediction of Splicing of *NFI* Variants**

Changhee Ha, Jong-Won Kim and Ja-Hyun Jang

Department of Laboratory Medicine and Genetics, Samsung Medical Center,  
Sungkyunkwan University School of Medicine, Seoul, Republic of Korea

**Table S2.** PCR primer sets for whole *NFI* genomic DNA sequence analysis.

| Fragement | Forward sequence         | Reverse sequence         | Product (bp) |
|-----------|--------------------------|--------------------------|--------------|
| 1-RT      | ctccacagacctctccttg      | aataaaaccccagaggcagaa    | 544          |
| 2-RT      | aaaatgtcttgctgggcaac     | gcaaaaccatccaccaagtc     | 498          |
| 3-RT      | ggcattttggaactgggtag     | gcaagaaacaaggcagtcaa     | 496          |
| 4-RT      | tcattttcctactgttcagtccat | gagctttggatctgcatgaat    | 497          |
| 5-RT      | cacacccagcaatacgaatg     | caggaacttctatctgcctgct   | 499          |
| 6-RT      | gggagattagctcacaaatgc    | tgtgttatagttgggcaagagg   | 500          |
| 7-RT      | tgtggaaccctgacactgaa     | gccagaattgcttctctgct     | 494          |
| 8-RT      | ccatgtgagtggaggaggat     | gatgttcagagctgccttca     | 494          |
| 9-RT      | caaattgaagaataccatcagcaa | gcttccatcaattccacacc     | 489          |
| 10-RT     | gaacatcaaaccaagcagca     | tcacccatcattgtgaccag     | 499          |
| 11-RT     | caaggatctccagacaagagcta  | ctggttttcctcaaggctct     | 499          |
| 12-RT     | cctggatcctttattacgaattg  | aatcattgaaaggccgcata     | 500          |
| 13-RT     | aatcctgccattgtctcacc     | cctgatgcctagtcataaattcc  | 490          |
| 14-RT     | tcttgcatacctgggtcctc     | agcagccgctcatgatactt     | 465          |
| 15-RT     | tttgtgtttttcctggcttt     | cacactcctgggtgatgaag     | 466          |
| 16-RT     | tgacatttattatgcttcggaaa  | ccaaacaaagggttttcaattc   | 500          |
| 17-RT     | ctgccaacaacacctcttt      | ttttgcacatcctccaataa     | 468          |
| 18-RT     | gggtggcttgggatcaataaa    | atgacctgtcccggtaactg     | 499          |
| 19-RT     | tgaagagaccaagcaagttttg   | tggctgtaattggtagtgc      | 484          |
| 20-RT     | tctcatgggcagataaagca     | caatttctgtgttgtaaccagagt | 500          |
| 21-RT     | gcaaatggatcattttgttgg    | caacttcttagtggtggcctga   | 496          |
| 22-RT     | taccttgacgccacatatcc     | gcacaacaggaaagactttgg    | 466          |
| 23-RT     | ggcgctgcttcttactgttc     | aaaggttaagggtggcagtga    | 488          |
| 24-RT     | tgcttgattgacacgtacc      | gcagcattaaatttaggcaagg   | 496          |

**Table S3.** PCR primer sets for *NFI* complementary DNA sequence analysis.

| Exon | Forward sequence          | Reverse sequence         | Product (bp) |
|------|---------------------------|--------------------------|--------------|
| 1    | cagaccctctccttgccctctt    | ggatggagggtcggaggctg     | 439          |
| 2    | tgtgggtgatgcagtttcc       | tccaaagtcacagaaaatca     | 368          |
| 3    | tctgggaggtaaaatggaaga     | ttgtctgtcaccagggtcagc    | 364          |
| 4    | ttttgttctgtgtgtgtttga     | acctaagcctgggagggtcaa    | 445          |
| 5    | gtcttgaactcctggcctca      | ttggtgttctagttcagcacaat  | 337          |
| 6    | cgagttttgggtttatgttaggtg  | ttcttctgaaaatgaatgtgaaa  | 342          |
| 7    | gtttcacattcattttcaggaag   | gctccaaggaaaggaagagg     | 400          |
| 8    | tgttgcccttgggttttac       | tggttccctgaaatactttgc    | 364          |
| 9    | tgagttttagaggctgttaattgc  | tccatttaggctgatgaacaca   | 435          |
| 10   | ttcttctggcagctggattt      | aaggctctgaaacgaacatcaa   | 381          |
| 11   | tgctgttcttttggcttca       | tatggtcccttcgggtcaaga    | 362          |
| 12   | atggtgtgtgtttgcatggt      | ccaaagcagcaggaatagga     | 346          |
| 13   | cttgatgtatgtctggggaatg    | ggatgagaacagagatctcatcaa | 828          |
| 14   | caaagtcctgggcttacagg      | cagaaaccacacaccaaagg     | 372          |
| 15   | tccttagaggtttgtgttcacc    | caaaaccataaaacctttggaa   | 382          |
| 16   | aatgccattcttatgtctggtt    | tgagaacattgggagggaagg    | 326          |
| 17   | ggagagtctcaaacaggaagaca   | gccccaaagtccacaaagag     | 400          |
| 18   | gtctccacccttgactctcag     | agatgccatgtgctttgagg     | 327          |
| 19   | tttgggtggagcttatcagg      | tcagctacagccaagtttcaa    | 331          |
| 20   | ccctcaatttgaagcctct       | tgtttactttactgagcactcttg | 372          |
| 21-1 | tgtcatggaagaaatgttga      | agcattggatacagagcagga    | 481          |
| 21-2 | gcagatacacctgtcagcaaatt   | ccacaggcatagagccaaat     | 458          |
| 22   | atttggtctatgcctgtgg       | cacaccctagtttgtgtgcag    | 387          |
| 23   | aaggtagccagaagtgtgtacg    | tgctctctttcatgtcctcct    | 393          |
| 24   | aggtgtgtgtgtggcttcaa      | tgacaacactaactcccaaaca   | 375          |
| 25   | gaggtttatttgaggggaagtg    | ttcctatcctagtcctgtcatgg  | 301          |
| 26   | tcgcgagagaggagagaaac      | tggccttgctgaagtaatttt    | 400          |
| 27   | caaaacctagagaactggcatgt   | aacatctttcttctggctctgaaa | 424          |
| 28   | gcaagtgggtgtcaactttgg     | acaatcagccctgcacattc     | 351          |
| 29   | tacagaatgtgcagggtga       | gtccctggatctaaggcaaa     | 400          |
| 30   | cgttgcaacttggttaaatgt     | ccacacaccatcagcagcta     | 334          |
| 31   | ttgggtctcaacatttcttgc     | cagtgaagggtcaaataggctga  | 392          |
| 32   | tgcaaagtttgaccttgaact     | caaaagcacataactgaaaacca  | 370          |
| 33   | ttgggaagggttagaaacactacct | tgacctagagcaggaaaagaaaa  | 397          |
| 34   | tgtgtgaacaagccctccat      | ccaagaagatgcaaagtaaaaagc | 376          |
| 35   | tggctctgaggtcttttgg       | tcatatctaacaagtggcctggt  | 366          |
| 36   | tgggtgatgttgccaaatta      | ccctgctatatgtctccaag     | 399          |

|      |                             |                           |     |
|------|-----------------------------|---------------------------|-----|
| 37-1 | ggagatttgctcttctcttagcc     | ttgctaccttgaggccagt       | 474 |
| 37-2 | tgttttcctggcttgctt          | cgacagccttacgtgacattt     | 399 |
| 38-1 | ctcccaaagtgtgggatta         | agagtcgggctgtgacagtt      | 528 |
| 38-2 | tgttcggaaattgaagaaa         | ccaacactgcataccttcca      | 381 |
| 39   | tgatcatactttgtaacagaatcacia | tcactggaaaattctgaaatgaaa  | 392 |
| 40   | ttttctccaggcctgattct        | ccaatgtggcaccagataaa      | 391 |
| 41   | ttgattaggctgttccaatgaa      | catgggactcaaagttttagca    | 352 |
| 42-1 | tgctaaaactttgagtcctatgt     | tggagaaaggaaactggtaaca    | 385 |
| 42-2 | gctgtagctttggcttctgg        | gcaacttggtgtagagcaca      | 593 |
| 43   | gaggtttgatttaggaacatga      | caaaatagcacaataaaccaatttc | 448 |
| 44   | ttgcatggactgtgttattgg       | tggttgccaggatggattat      | 355 |
| 45   | gctggaccagtggacagAAC        | tttcattgacctcaaatttaaag   | 391 |
| 46   | tcctgaattcattccgagattc      | tccttagcactgatgagacca     | 423 |
| 47   | ccccaaaagagaaaacatgg        | gcaacaagaaaagatggaagag    | 332 |
| 48   | tgttctgtggttttctgcagtc      | gcctggcctagtgtgcattt      | 415 |
| 49   | cagggagaagacctcagca         | tgaccaagggaacacatttca     | 435 |
| 50   | tgTgcacatttaacaggTactatgc   | ctgctgcttgcctccattag      | 326 |
| 51   | taggacagccacttggagg         | tgttcaaggTcccatttca       | 447 |
| 52   | tgggaacaaaacccttgag         | tggctggaaaataaacatgacttt  | 388 |
| 53   | cagcattgtaaataggtagccaaa    | tgtttgggtgagaagtagaagactg | 431 |
| 54   | ccccaccctcaaattttatt        | ctttgcaaccagtgcacatt      | 340 |
| 55   | tgaagaaatgcccagaaag         | agtcagtgcattctacaacagc    | 363 |
| 56   | ggttttagttgctttgacactca     | aatacacacaccccaacacca     | 391 |
| 57   | tggcttcagatggggattta        | gggaattcctaattgttggtgtc   | 346 |
| 58   | atgtgtccccgtgttaagc         | caaaccggatgggttcatta      | 366 |

---
